# Supplementary material
Source: HighWire-hosted journal article supplement (http://www.qdcxjkg.com/highwire/filestream/113039/field_highwire_adjunct_files/1/TableO2.pdf)
Supplement: TableO2.pdf [file TableO2.pdf]

TableO2 Gene main effects of *HMOX1* and *GST* polymorphisms on annual decline in FEF<sub>25-75</sub> stratified by sex

| Gene-Polymorphism                                       | WOMEN<br>(n=2308)                                                                               |                         |                            |                | MEN<br>(n=2057)                                                                                 |       |                            |                    |
|---------------------------------------------------------|-------------------------------------------------------------------------------------------------|-------------------------|----------------------------|----------------|-------------------------------------------------------------------------------------------------|-------|----------------------------|--------------------|
|                                                         | Gene main effect<br>on decline in FEF <sub>25-75</sub> /year<br>(in mL/s per year) <sup>1</sup> |                         | 95% confidence<br>interval | P-value        | Gene main effect<br>on decline in FEF <sub>25-75</sub> /year<br>(in mL/s per year) <sup>1</sup> |       | 95% confidence<br>interval | P-value            |
| <b>Heme Oxygenase-1 Single Nucleotide Polymorphisms</b> |                                                                                                 |                         |                            |                |                                                                                                 |       |                            |                    |
|                                                         | <i>Alleles</i>                                                                                  | <i>N (whole sample)</i> |                            |                |                                                                                                 |       |                            |                    |
| <i>HMOX1</i><br>rs2071746                               | AA                                                                                              | 1401                    | ref                        |                |                                                                                                 | ref   |                            |                    |
|                                                         | AT                                                                                              | 2089                    | 0.7                        | -4.6 to 6.1    | 0.093 <sup>c</sup>                                                                              | 1.1   | -5.8 to 7.9                | 0.109 <sup>c</sup> |
|                                                         | TT                                                                                              | 763                     | 5.7                        | -1.2 to 12.7   |                                                                                                 | 7.1   | -1.8 to 15.9               |                    |
| <i>HMOX1</i><br>rs735266                                | AA                                                                                              | 1669                    | ref                        |                |                                                                                                 | ref   |                            |                    |
|                                                         | AT                                                                                              | 2022                    | -1.0                       | -6.1 to 4.1    | 0.365 <sup>c</sup>                                                                              | 3.3   | -3.3 to 9.8                | 0.054 <sup>a</sup> |
|                                                         | TT                                                                                              | 595                     | 2.5                        | -4.7 to 9.8    |                                                                                                 | 9.5   | 0.0 to 19.0                |                    |
| <i>HMOX1</i><br>rs5995098                               | CC                                                                                              | 2021                    | ref                        |                |                                                                                                 | ref   |                            |                    |
|                                                         | CG                                                                                              | 1876                    | -1.7                       | -6.7 to 3.2    | 0.217 <sup>c</sup>                                                                              | 0.2   | -6.2 to 6.5                | 0.062 <sup>c</sup> |
|                                                         | GG                                                                                              | 427                     | 4.1                        | -4.1 to 12.2   |                                                                                                 | 9.7   | -0.9 to 20.2               |                    |
| <b>Heme Oxygenase-1 Haplotypes<sup>2</sup></b>          |                                                                                                 |                         |                            |                |                                                                                                 |       |                            |                    |
|                                                         | <i>No of alleles</i>                                                                            | <i>N</i>                |                            |                |                                                                                                 |       |                            |                    |
| Haplotype<br>AAC                                        | 0                                                                                               | 798                     | ref                        |                |                                                                                                 | ref   |                            |                    |
|                                                         | 1                                                                                               | 2178                    | -3.6                       | -10.0 to 2.7   | 0.181 <sup>b</sup>                                                                              | -5.1  | -13.2 to 3.0               | 0.139 <sup>b</sup> |
|                                                         | 2                                                                                               | 1389                    | -4.9                       | -11.7 to 2.0   |                                                                                                 | -6.9  | -15.5 to 1.8               |                    |
| Haplotype<br>ATC                                        | 0                                                                                               | 3925                    | ref                        |                |                                                                                                 | ref   |                            |                    |
|                                                         | 1                                                                                               | 431                     | 6.0                        | -1.9 to 13.9   | 0.123 <sup>a</sup>                                                                              | -1.4  | -11.2 to 8.3               | 0.704 <sup>a</sup> |
|                                                         | 2                                                                                               | 9                       | 28.9                       | -79.0 to 136.9 |                                                                                                 | -9.0  | -61.8 to 43.9              |                    |
| Haplotype<br>TTC                                        | 0                                                                                               | 3873                    | ref                        |                |                                                                                                 | ref   |                            |                    |
|                                                         | 1                                                                                               | 478                     | 1.8                        | -5.6 to 9.3    | 0.488 <sup>c</sup>                                                                              | 5.6   | -3.9 to 15.1               | 0.321 <sup>b</sup> |
|                                                         | 2                                                                                               | 14                      | 14.7                       | -26.1 to 55.5  |                                                                                                 | -25.7 | -78.9 to 27.6              |                    |
| Haplotype<br>TTG                                        | 0                                                                                               | 2057                    | ref                        |                |                                                                                                 | ref   |                            |                    |
|                                                         | 1                                                                                               | 1895                    | -2.0                       | -6.9 to 2.9    | 0.210 <sup>c</sup>                                                                              | 0.1   | -6.2 to 6.3                | 0.032 <sup>c</sup> |
|                                                         | 2                                                                                               | 413                     | 4.0                        | -4.2 to 12.2   |                                                                                                 | 11.3  | 0.6 to 22.0                |                    |
| <b>Heme Oxygenase-1 Promoter Repeat Polymorphism</b>    |                                                                                                 |                         |                            |                |                                                                                                 |       |                            |                    |
|                                                         | <i>long allele</i>                                                                              | <i>N</i>                |                            |                |                                                                                                 |       |                            |                    |
|                                                         | ( <i>&gt;=33 repeats</i> )                                                                      |                         |                            |                |                                                                                                 |       |                            |                    |
| <i>HMOX1</i> (GT) <sub>n</sub>                          | no                                                                                              | 3919                    | ref                        |                |                                                                                                 | ref   |                            |                    |
|                                                         | yes                                                                                             | 446                     | 4.0                        | -3.7 to 11.7   | 0.310                                                                                           | -2.7  | -12.7 to 7.4               | 0.603              |
| <b>Glutathione S-Transferase Polymorphisms</b>          |                                                                                                 |                         |                            |                |                                                                                                 |       |                            |                    |
|                                                         | <i>complete</i>                                                                                 |                         |                            |                |                                                                                                 |       |                            |                    |
| <i>GSTM1</i><br>deletion <sup>3</sup>                   | no                                                                                              | 2032                    | ref                        |                |                                                                                                 | ref   |                            |                    |
|                                                         | yes                                                                                             | 2319                    | -3.6                       | -8.3 to 1.0    | 0.128                                                                                           | 2.9   | -3.1 to 9.0                | 0.341              |
| <i>GSTT1</i><br>deletion <sup>3</sup>                   | no                                                                                              | 3554                    | ref                        |                |                                                                                                 | ref   |                            |                    |
|                                                         | yes                                                                                             | 797                     | 4.4                        | -1.5 to 10.2   | 0.145                                                                                           | -6.2  | -14.3 to 1.8               | 0.126              |
| <i>GSTP1</i> Val/Ile<br>Polymorphism                    | Ile / Ile                                                                                       | 2061                    | ref                        |                |                                                                                                 | ref   |                            |                    |
|                                                         | Ile/Val                                                                                         | 1892                    | -4.2                       | -9.0 to 0.7    | 0.089 <sup>b</sup>                                                                              | -3.7  | -10.0 to 2.6               | 0.159 <sup>a</sup> |
|                                                         | Val/Val                                                                                         | 401                     | -3.4                       | -12.0 to 5.3   |                                                                                                 | -6.1  | -16.7 to 4.5               |                    |

<sup>a</sup> under an additive genetic model

<sup>b</sup> under a dominant genetic model

<sup>c</sup> under a recessive genetic model

<sup>1</sup> Negative values represent accelerations of the natural decline, positive values attenuations, compared to the reference group

Estimates from a multivariable linear regression of annual change in FEF<sub>25-75</sub> on genetic variants adjusted for:

PM10 exposure at baseline, annual change in PM10, sex, age, age squared, height and atopy at baseline, smoking status at follow-up, cigarettes per day in smokers at both surveys, pack-years up to baseline and between surveys, parental smoking, workplace-exposure to dust and fumes at each survey, baseline BMI, change in BMI and the interaction between the two, level of education and its change, nationality, season of assessment and clustering within area.

<sup>2</sup> Determined from rs2071746, rs735266 and rs5995098 SNPs (in this sequence) using PHASE software v2.1

<sup>3</sup> Deletions are homozygous gene deletions (null vs. non-null)
